# Supplementary material for: Assessing the Completeness of Reporting in Preclinical Oncolytic Virus Therapy Studies
Source: PubMed Central journal article supplement — Mol Ther Oncolytics. 2019 May 21;14:179–87. doi: 10.1016/j.omto.2019.05.004 (PMC6586991; doi:10.1016/j.omto.2019.05.004), 2019-05-21
Supplement: mmc1.pdf [file mmc1.pdf]

## **Supplemental Information**

### **Assessing the Completeness of Reporting in Preclinical Oncolytic Virus Therapy Studies**

**Dean A. Fergusson, Neil L. Wesch, Garvin J. Leung, Jenna L. MacNeil, Isidora Conic, Justin Presseau, Kelly D. Cobey, Jean-Simon Diallo, Rebecca Auer, Jonathan Kimmelman, Natasha Kekre, Nader El-Sayes, Ramya Krishnan, Brian A. Keller, Carolina Ilkow, and Manoj M. Lalu**

## Supplementary Online Material

Table S1. Study design and publication characteristics.

| Question                                                  | Response                       | Frequency |
|-----------------------------------------------------------|--------------------------------|-----------|
| Indicate the corresponding author's country of residence. | United States                  | 72        |
|                                                           | China                          | 63        |
|                                                           | Canada                         | 16        |
|                                                           | Japan                          | 15        |
|                                                           | Finland                        | 11        |
|                                                           | South Korea                    | 10        |
|                                                           | United Kingdom                 | 9         |
|                                                           | Spain                          | 8         |
|                                                           | Germany                        | 7         |
|                                                           | France                         | 6         |
|                                                           | Russia                         | 5         |
|                                                           | Sweden                         | 3         |
|                                                           | Austria                        | 2         |
|                                                           | Denmark                        | 2         |
|                                                           | India                          | 2         |
|                                                           | Belgium                        | 1         |
| Ireland                                                   | 1                              |           |
| Netherlands                                               | 1                              |           |
| Saudi Arabia                                              | 1                              |           |
| Switzerland                                               | 1                              |           |
| Indicate the year of publication.                         | 2016                           | 169       |
|                                                           | 2017                           | 67        |
| Indicate all contributing forms of research funding.      | Government                     | 196       |
|                                                           | Academic                       | 107       |
|                                                           | Foundation / Charity           | 94        |
|                                                           | Industry                       | 39        |
|                                                           | Other (individual donations)   | 12        |
|                                                           | No mention of funding          | 5         |
| Explicitly unfunded                                       | 2                              |           |
| What is the journal of publication?                       | Oncotarget                     | 29        |
|                                                           | Molecular Therapy – Oncolytics | 23        |
|                                                           | Gene Therapy                   | 12        |
|                                                           | Molecular Therapy              | 10        |
|                                                           | Cancer Gene Therapy            | 10        |
|                                                           | Oncolmmunology                 | 9         |
|                                                           | Clinical Cancer Research       | 7         |
|                                                           | Molecular Cancer Therapeutics  | 7         |
|                                                           | PLoS One                       | 6         |
|                                                           | Human Gene Therapy             | 5         |
|                                                           | Neuro-Oncology                 | 5         |
| Nature Communications                                     | 4                              |           |

|  |                                            |   |
|--|--------------------------------------------|---|
|  | Cancer Research                            | 4 |
|  | Vaccine                                    | 4 |
|  | Cancer Letters                             | 4 |
|  | Journal of Controlled Release              | 3 |
|  | Scientific Reports                         | 3 |
|  | International Journal of Oncology          | 3 |
|  | International Journal of Cancer            | 3 |
|  | Oncology Reports                           | 3 |
|  | Journal of Virology                        | 3 |
|  | Viruses                                    | 3 |
|  | Cancer Biology                             | 2 |
|  | Acta Biomaterialia                         | 2 |
|  | Virus Research                             | 2 |
|  | Cancer Science                             | 2 |
|  | Journal of Cancer                          | 2 |
|  | ACS Nano                                   | 2 |
|  | Journal of Translational Medicine          | 2 |
|  | Blood                                      | 2 |
|  | Journal of Pharmacological Sciences        | 2 |
|  | Journal of General Virology                | 2 |
|  | Cancer Immunology Immunotherapy            | 2 |
|  | Apoptosis                                  | 2 |
|  | Virology                                   | 2 |
|  | Molecular Medicine Reports                 | 1 |
|  | Molecular Medicine                         | 1 |
|  | Medical Oncology                           | 1 |
|  | Journal of Cellular and Molecular Medicine | 1 |
|  | Journal of Gene Medicine                   | 1 |
|  | Journal of the National Cancer Institute   | 1 |
|  | Cancer Immunology Research                 | 1 |
|  | Therapeutics and Clinical Risk Management  | 1 |
|  | Surgery                                    | 1 |
|  | The Journal of Immunology                  | 1 |
|  | The Journal of Nuclear Medicine            | 1 |
|  | Virus Genes                                | 1 |
|  | Veterinary and Comparative Oncology        | 1 |
|  | Applied Materials                          | 1 |
|  | Molecular Oncology                         | 1 |
|  | Drug Design, Development and Therapy       | 1 |
|  | OncoTargets and Therapy                    | 1 |
|  | Molecular Therapy — Methods                | 1 |

|                                                                      |                                                                |     |
|----------------------------------------------------------------------|----------------------------------------------------------------|-----|
|                                                                      | Acta Pharmacologica Sinica                                     | 1   |
|                                                                      | Translational Oncology                                         | 1   |
|                                                                      | Breast Cancer Research                                         | 1   |
|                                                                      | American Journal of Cancer Research                            | 1   |
|                                                                      | Stem Cell Reports                                              | 1   |
|                                                                      | Oncolytic Virotherapy                                          | 1   |
|                                                                      | Cellular Immunology                                            | 1   |
|                                                                      | Frontiers in Oncology                                          | 1   |
|                                                                      | BMC Cancer                                                     | 1   |
|                                                                      | Reproductive Sciences                                          | 1   |
|                                                                      | Oncogene                                                       | 1   |
|                                                                      | Biochemical and Biophysical Research Communications            | 1   |
|                                                                      | International Immunopharmacology                               | 1   |
|                                                                      | Journal of Ovarian Research                                    | 1   |
|                                                                      | International Journal of Molecular Sciences                    | 1   |
|                                                                      | Journal of Immunology Research                                 | 1   |
|                                                                      | Oral Oncology                                                  | 1   |
|                                                                      | Tumor Biology                                                  | 1   |
|                                                                      | Cellular Oncology                                              | 1   |
|                                                                      | Cell Reports                                                   | 1   |
|                                                                      | EBioMedicine                                                   | 1   |
|                                                                      | Journal of Experimental & Clinical Cancer Research             | 1   |
|                                                                      | The Canadian Journal of Veterinary Research                    | 1   |
|                                                                      | Neurotherapeutics                                              | 1   |
|                                                                      | Head                                                           | 1   |
|                                                                      | Molecular Genetics, Microbiology and Virology                  | 1   |
|                                                                      | Current Gene Therapy                                           | 1   |
|                                                                      | Gut                                                            | 1   |
|                                                                      | Russian Journal of Genetics: Applied Research                  | 1   |
|                                                                      | International Journal of Clinical and Experimental<br>Medicine | 1   |
|                                                                      | Human Gene Therapy Clinical Development                        | 1   |
|                                                                      | Journal of Biomedical Science                                  | 1   |
|                                                                      |                                                                |     |
| Which of the following outcomes were investigated?                   | Cancer size/burden                                             | 204 |
|                                                                      | Survival                                                       | 116 |
|                                                                      | Viral Infectivity                                              | 109 |
|                                                                      | Anti-tumor response                                            | 94  |
|                                                                      | Cytokine response                                              | 55  |
|                                                                      | Tumor specificity/biodistribution                              | 52  |
|                                                                      |                                                                |     |
| From the title alone, could you tell this was a preclinical article? | Yes                                                            | 76  |
|                                                                      | No                                                             | 160 |

**Table S2. Epidemiology of viral, cancer, and animal models.**

| Question                                   | Response                          | Frequency |
|--------------------------------------------|-----------------------------------|-----------|
| What is the viral platform?                | Adenovirus                        | 104       |
|                                            | Vaccinia virus                    | 34        |
|                                            | Herpes simplex virus              | 27        |
|                                            | Vesicular stomatitis virus        | 15        |
|                                            | Measles virus                     | 11        |
|                                            | Newcastle disease virus           | 9         |
|                                            | Reovirus                          | 8         |
|                                            | Myxoma virus                      | 4         |
|                                            | Alphavirus                        | 3         |
|                                            | Cytomegalovirus                   | 3         |
|                                            | Maraba virus                      | 3         |
|                                            | Parvovirus                        | 3         |
|                                            | Lentivirus                        | 2         |
|                                            | Picornavirus                      | 2         |
|                                            | Tanapoxvirus                      | 2         |
|                                            | Canine distemper virus            | 1         |
|                                            | Chicken infectious anemia virus   | 1         |
|                                            | Foot-and-mouth disease virus      | 1         |
|                                            | Human papilloma virus             | 1         |
|                                            | Influenza virus                   | 1         |
| Lymphocytic choriomeningitis virus         | 1                                 |           |
| Mengovirus                                 | 1                                 |           |
| Mumps virus                                | 1                                 |           |
| Poliovirus                                 | 1                                 |           |
| Semliki forest virus                       | 1                                 |           |
| Tobacco mosaic virus                       | 1                                 |           |
| Is the virus replicating?                  | Yes                               | 182       |
|                                            | No                                | 31        |
|                                            | Unsure                            | 26        |
| What is the type of viral therapy?         | Monotherapy                       | 152       |
|                                            | Monotherapy + combination therapy | 74        |
|                                            | Combination therapy               | 10        |
| What is the route of viral administration? | Intratumoural                     | 176       |
|                                            | Not intratumoural                 | 77        |
|                                            | Unsure                            | 7         |

| Question                                       | Response          | Frequency |       |
|------------------------------------------------|-------------------|-----------|-------|
| What type of cancer was induced?               | Colorectal        | 42        |       |
|                                                | Skin              | 35        |       |
|                                                | Breast            | 33        |       |
|                                                | Liver             | 28        |       |
|                                                | Brain             | 25        |       |
|                                                | Lung              | 25        |       |
|                                                | Ovary             | 16        |       |
|                                                | Blood             | 15        |       |
|                                                | Pancreas          | 15        |       |
|                                                | Muscle            | 10        |       |
|                                                | Prostate          | 10        |       |
|                                                | Bladder           | 7         |       |
|                                                | Bone marrow       | 5         |       |
|                                                | Gastric           | 5         |       |
|                                                | Kidney            | 5         |       |
|                                                | Head and neck     | 4         |       |
|                                                | Bone              | 3         |       |
|                                                | Cervical          | 3         |       |
|                                                | Esophagus         | 2         |       |
| Mesothelium                                    | 2                 |           |       |
| Nervous system                                 | 1                 |           |       |
| Teratoma                                       | 1                 |           |       |
| Thyroid                                        | 1                 |           |       |
| What was the method of cancer/tumor induction? | Implantation      | 235       |       |
|                                                | Transgenic        | 3         |       |
|                                                | Chemical          | 0         |       |
| Indicate the type of implant.                  | Xenograft         | 153       |       |
|                                                | Syngeneic         | 99        |       |
| What is the site of the tumor?                 | Heterotopic       | 170       |       |
|                                                | Orthotopic        | 83        |       |
|                                                | Unsure            | 6         |       |
| Question                                       | Response          | Frequency |       |
| What was the type of animal(s) used?           | Mouse             | 231       | 25516 |
|                                                | Rat               | 5         | 516   |
|                                                | Hamster           | 4         | NA    |
|                                                | Non-human primate | 1         | 12    |

|                                                         |                             |     |
|---------------------------------------------------------|-----------------------------|-----|
|                                                         | Immunodeficient             | 134 |
| What type of animal model was used?                     | Humanized                   | 3   |
|                                                         | Partially immunocompromised | 16  |
|                                                         | Unsure                      | 5   |
|                                                         |                             |     |
| Was ethics approval for animal use explicitly reported? | Yes                         | 172 |
|                                                         | No                          | 64  |
| Was the housing and handling of animals reported?       | Yes                         | 104 |
|                                                         | No                          | 132 |

**Table S3. Reporting assessment results.** The frequency of reporting of all 21 items deconstructed and operationalized from the National Institutes of Health preclinical reporting guidelines across the all included studies. These recommendations are separated into seven distinct domains.

| Domain                                      | Item Description                                                                       | N=236<br>n (%) reported |
|---------------------------------------------|----------------------------------------------------------------------------------------|-------------------------|
| Standards                                   | Community based reporting guidelines listed                                            | 1 (0.4)                 |
| Replicates<br>(biological vs.<br>technical) | Results substantiated by repetition under a range of conditions                        | 225 (95)                |
|                                             | Number of subjects stated for all experimental outcomes                                | 25 (17)                 |
|                                             | Number of measurements per subject for one experimental outcome stated                 | 105 (44)                |
|                                             | Number of measurements per subject for all experimental outcomes stated                | 2 (1)                   |
| Statistics                                  | List of the total number of subjects used in each experimental group                   | 148 (63)                |
|                                             | List of all statistical tests used                                                     | 225 (95)                |
|                                             | Definition of the measure of central tendency                                          | 203 (86)                |
|                                             | Definition of the measure of dispersion and precision                                  | 206 (87)                |
| Randomization                               | Random group assignment reported                                                       | 103 (44)                |
|                                             | Description of the method of random group assignment                                   | 2 (1)                   |
| Blinding                                    | Experimenters blinded to group allocation during conduct of the experiment             | 7 (3)                   |
|                                             | Experimenters blinded to group allocation during result assessment                     | 15 (6)                  |
| Sample Size<br>Estimation                   | Description of an <i>a priori</i> primary outcome                                      | 12 (5)                  |
|                                             | Sample size computed during study design                                               | 10 (4)                  |
|                                             | Description of the method of sample size determination                                 | 4 (2)                   |
| Inclusion and<br>Exclusion Criteria         | Total number of animals procured for the experiment reported                           | 7 (3)                   |
|                                             | Description of the criteria used for the exclusion of any data or subjects             | 11 (5)                  |
|                                             | Description of any outcomes that were measured and not reported in the results section | 228 (97)                |
|                                             | Pilot or preliminary studies performed and listed                                      | 27 (11)                 |
|                                             | Null or negative outcomes included in the results                                      | 96 (41)                 |



**Table S4. Exploratory comparative analysis.** A comparison in the completeness of reporting between *Oncotarget*, which was delisted by MEDLINE in 2016,<sup>33</sup> compared to all other articles included in our review.

|                                  |                                         | Oncotarget<br>N=29 | Other<br>N=207 |
|----------------------------------|-----------------------------------------|--------------------|----------------|
| Domain                           | Description                             | n (%) Reported     |                |
| Standards                        | Reporting guidelines                    | 0 (0)              | 1 (0)          |
| Replicates                       | Range of conditions                     | 29 (100)           | 192 (93)       |
|                                  | Number of subject for one outcome       | 15 (52)            | 133 (64)       |
|                                  | Number of subjects for all outcomes     | 4 (14)             | 21 (10)        |
|                                  | Number of measurements for one outcome  | 10 (34)            | 95 (46)        |
|                                  | Number of measurements for all outcomes | 0 (0)              | 2 (1)          |
| Statistics                       | Statistical tests used                  | 25 (86)            | 200 (97)       |
|                                  | Measure of central tendency             | 24 (83)            | 179 (86)       |
|                                  | Measure of dispersion                   | 23 (79)            | 183 (88)       |
| Randomization                    | Multiple experimental groups            | 29 (100)           | 205 (99)       |
|                                  | Random group assignment                 | 15 (52)            | 89 (43)        |
|                                  | Method of randomization                 | 0 (0)              | 2 (1)          |
| Blinding                         | Group allocation blinding               | 3 (10)             | 4 (2)          |
|                                  | Result assessment blinding              | 2 (7)              | 13 (6)         |
| Sample Size Estimation           | Primary outcome                         | 2 (7)              | 10 (5)         |
|                                  | Sample size calculation                 | 2 (7)              | 10 (5)         |
|                                  | Mathematical method used                | 0 (0)              | 4 (2)          |
| Inclusion and Exclusion Criteria | Total number of subjects                | 0 (0)              | 7 (3)          |
|                                  | Data/subjects/results exclusion         | 0 (0)              | 11 (5)         |
|                                  | No result omission                      | 29 (100)           | 199 (96)       |
|                                  | Preliminary studies                     | 1 (3)              | 26 (13)        |
|                                  | Null/negative results                   | 9 (31)             | 87 (42)        |
